# Supplementary material for: Tropical Pacific Climate Variability under Solar Geoengineering: Impacts on ENSO Extremes
Source: Copernicus journal article supplement (doi:10.5194/acp-2018-1312), 2019-01-07
Supplement: Supplementary file 1 [file acp-2018-1312-supplement.pdf]

1 **Tropical Pacific Climate Variability under Solar Geoengineering: Impacts on ENSO**  
2 **Extremes**

3 **Abdul Malik<sup>1,2</sup>, Peer J. Nowack<sup>1,3,4</sup>, Joanna D. Haigh<sup>1,3</sup>, Long Cao<sup>5</sup>, Luqman Atique<sup>5</sup>,**  
4 **Yves Plancherel<sup>1</sup>**

5 <sup>1</sup>Grantham Institute – Climate Change and the Environment, Imperial College London,  
6 London, United Kingdom

7 <sup>2</sup>Oeschger Centre for Climate Change Research, and Institute of Geography, University of  
8 Bern, Bern, Switzerland

9 <sup>3</sup>Department of Physics, Blackett Laboratory, Imperial College London, United Kingdom

10 <sup>4</sup>Data Science Institute, Imperial College London, United Kingdom

11 <sup>5</sup>School of Earth Sciences, Zhejiang University, Hangzhou, China

12

13 *Correspondence to:* Abdul Malik (a.malik@imperial.ac.uk)

14 **Supplementary**

15

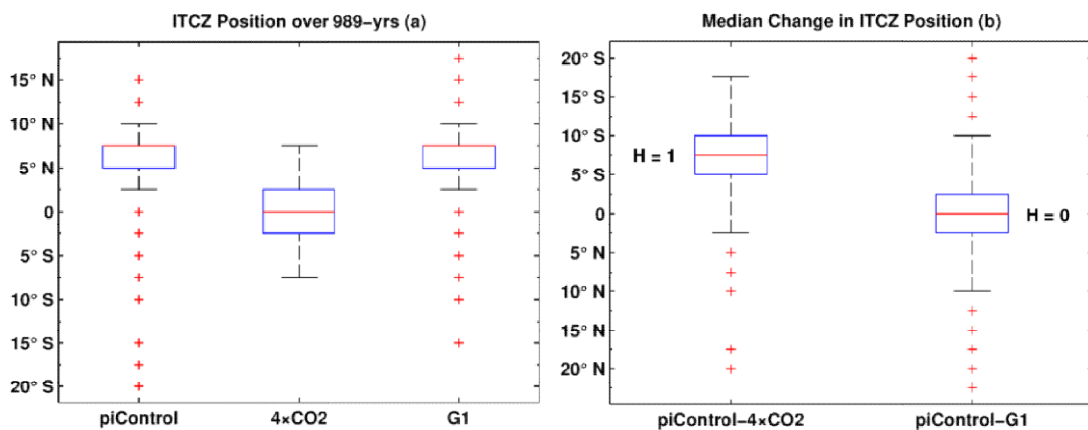

16

17 **Figure S1.** (a) Variability in ITCZ position over the simulated period for piControl, 4×CO<sub>2</sub>,  
18 and G1. The red lines show the media position (b) change in position of ITCZ relative to  
19 piControl under 4×CO<sub>2</sub> and G1. The red lines show median change in position relative to  
20 piControl. The ITCZ position is calculated by finding the latitude where maximum rainfall  
21 occurs. H = 1 indicate that the change is statistically significant at 99 % cl using non-  
22 parametric Wilcoxon rank sum test

23

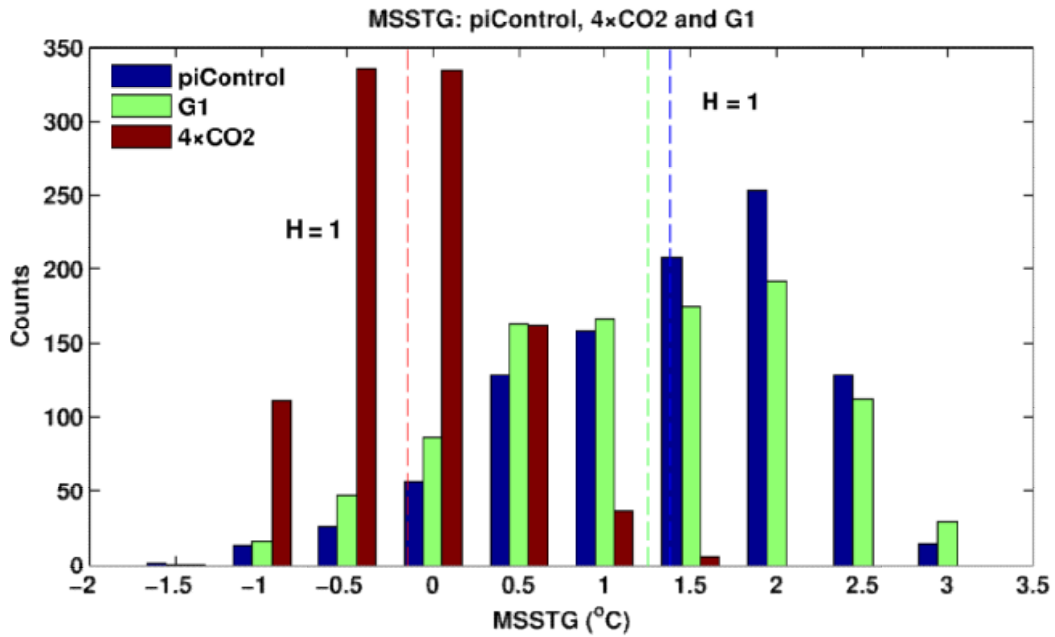

1

2 **Figure S2.** Histogram of MSSTG for piControl, 4×CO<sub>2</sub>, and G1. The values are plotted at the  
 3 centre of each bin with an interval of 0.5 °C. Blue, green, and red vertical lines indicate  
 4 climatological mean values of MSSTG under piControl (1.38 °C), G1 (1.25 °C), and 4×CO<sub>2</sub> (-  
 5 0.15 °C), respectively. H = 1 indicate that shift in mean is statistically significant at 99 % cl  
 6 using non-parametric Wilcoxon rank sum test.

7

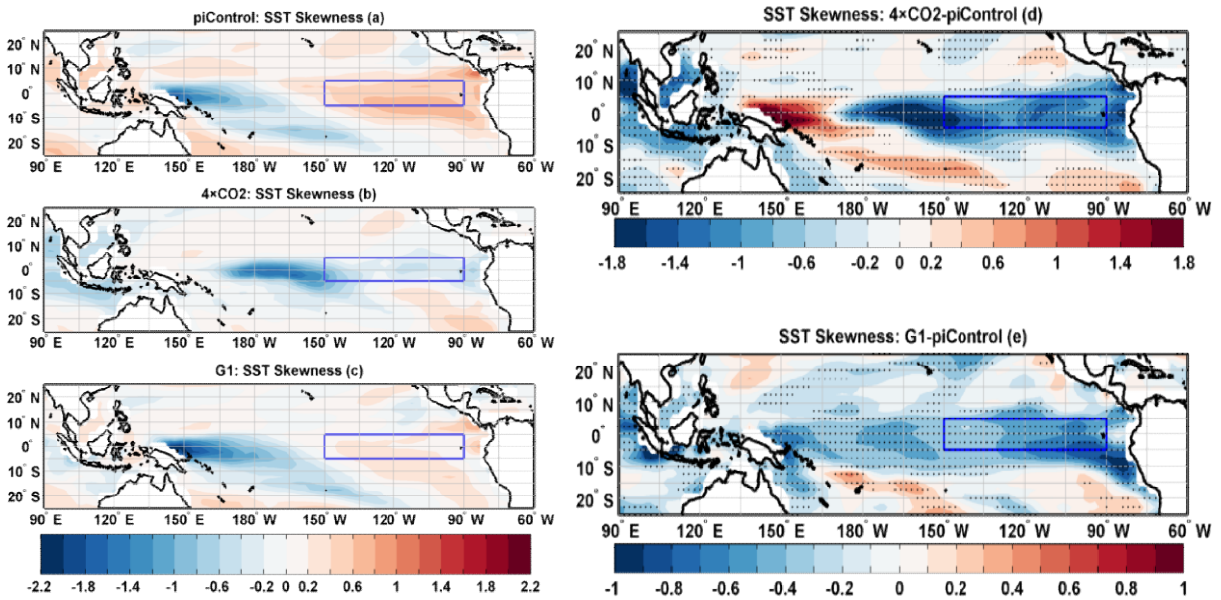

8

9 **Figure S3.** Quadratically detrended SST skewness for (a) piControl (b) 4×CO<sub>2</sub> (c) G1 (d)  
 10 difference: 4×CO<sub>2</sub>-piControl and (e) difference: G1-piControl. Stipples indicate grid points  
 11 where difference is statistically significant at 95 % cl bootstrap method with 10,000  
 12 realizations.

13

1

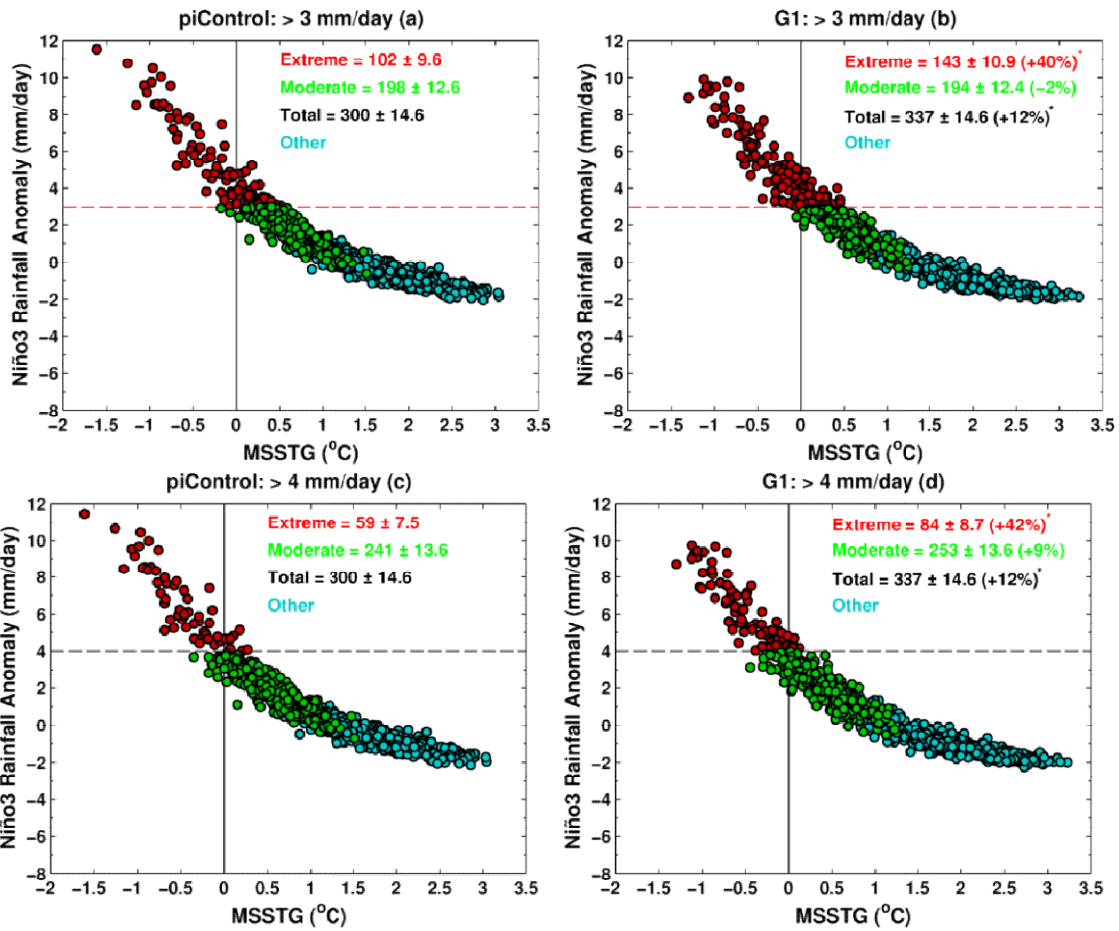

2

3

4 **Figure S4.** Simulated relationship between MSSTG and Niño3 rainfall when extreme El  
5 Niño is defined with Niño3 rainfall anomaly > 3 mm day<sup>-1</sup> for (a) piControl and (b) G1.  
6 Simulated relationship between MSSTG and Niño3 rainfall when extreme El Niño is defined  
7 with Niño3 rainfall anomaly > 4 mm day<sup>-1</sup> for (c) piControl and (d) G1. The dashed red  
8 (black) horizontal line indicates threshold anomaly of 3 (4) mm day<sup>-1</sup>. See text for definition  
9 of moderate and total El Niño events. The asterisk indicates that the change in frequency is  
10 statistically significant at 99 % cl. Numbers with ± symbol indicate s.d. calculated with  
11 10,000 bootstrap realisations.

12

13

14

15

16

17

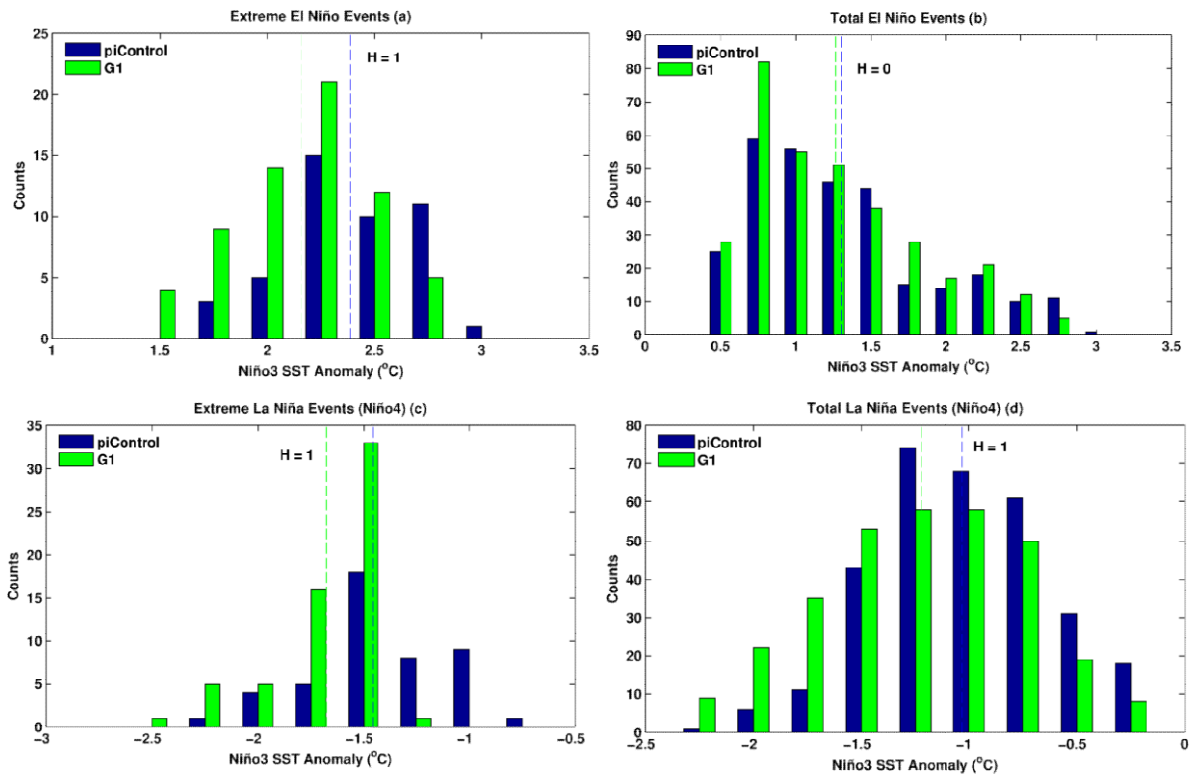

**Figure S5.** Histograms of quadratically detrended Niño3 SST anomalies calculated for (a) extreme El Niño events (b) total El Niño events (c) extreme La Niña events and (d) total La Niña events. Blue, and green vertical lines indicate mean values for piControl and G1, respectively.  $H = 1$  indicate that shift in mean is statistically significant at 99 % cl using non-parametric Wilcoxon rank sum test.

1 **Tables**

2 **Table S1.** Mean SST (°C) and rainfall (mm day<sup>-1</sup>) climatology over tropical Pacific (25° N-  
3 25° S; 90° E-60° W)

| Experiment        | Mean<br>± standard Error | Difference w.r.t.<br>piControl | Std. Dev. 10,000<br>Realizations | ~ Change w.r.t.<br>piControl (%) |
|-------------------|--------------------------|--------------------------------|----------------------------------|----------------------------------|
| piControl         | 26.52* (4.32)*           |                                | 0.009 [0.0042]                   |                                  |
| 4×CO <sub>2</sub> | 30.42* (4.53)*           | +3.9 (+0.21)                   |                                  | +15* (+5)*                       |
| G1                | 26.22* (4.09)*           | -0.30 (-0.23)                  |                                  | -1* (-5)*                        |

4 Key: SST (Rainfall); \*99 % cl; \*\*95 % cl

5

6 **Table S2.** Meridional SST Gradient (MSSTG)

| Experiment        | Mean (°C) | Difference w.r.t.<br>piControl (°C) | Std. Dev. 10,000<br>Realizations (°C) | ~ Change w.r.t.<br>piControl (%) |
|-------------------|-----------|-------------------------------------|---------------------------------------|----------------------------------|
| piControl         | 1.38*     |                                     | 0.0265                                |                                  |
| 4×CO <sub>2</sub> | -0.15*    | -1.53                               |                                       | -111*                            |
| G1                | 1.25*     | -0.13                               |                                       | -9*                              |

7 Key: \*99 % cl; \*\*95 % cl

8

9 **Table S4.** Total number of El Niño events (SST > 0.5 s.d.)

| Experiment | Amplitude (°C)  | Difference w.r.t.<br>piControl (°C) | Std. Dev. 10,000<br>Realizations (°C) | ~ Change w.r.t.<br>piControl (%) |
|------------|-----------------|-------------------------------------|---------------------------------------|----------------------------------|
| piControl  | 300 (380) [312] |                                     | 14.6 (15.4) [14.7]                    |                                  |
| G1         | 337 (430) [352] | 37 (50) [40]                        |                                       | +12** (+13*) [+13**]             |

10 Key: Niño3 (Niño4) [Niño3.4]; \*99 % cl; \*\*95 % cl

11

12 **Table S5.** La Niña events

| Experiment | Index < -1.75<br>±s.d. with<br>10,000<br>realizations | -1 > index > -1.75<br>±s.d. with 10,000<br>realizations | -0.5 > index > -1<br>±s.d. with 10,000<br>realizations | Index < -0.5<br>±s.d. with 10,000<br>realizations | ~ Change in<br>Extreme La<br>Niña Events<br>w.r.t.<br>piControl (%) |
|------------|-------------------------------------------------------|---------------------------------------------------------|--------------------------------------------------------|---------------------------------------------------|---------------------------------------------------------------------|
| piControl  | 8±2.8<br>(46±6.5)<br>[16±3.9]                         | 158±11.4<br>(145±11.1)<br>[155±11.5]                    | 183±12.3<br>(122±10.3)<br>[179±12.1]                   | 349±15<br>(313±14.6)<br>[350±15.2]                |                                                                     |
| G1         | 40<br>(61)<br>[38]                                    | 156<br>(130)<br>[163]                                   | 170<br>(121)<br>[156]                                  | 366<br>(312)<br>[357]                             | +400*<br>(+32)**<br>[+138]*                                         |

13 Key: Niño3 (Niño4) [Niño3.4]; \*99% cl; \*\*95% cl

14

15
